# Supplementary material for: Metabolic rewiring and autophagy inhibition correct lysosomal storage disease in mucopolysaccharidosis IIIB
Source: PubMed Central journal article supplement (PMC10864807; doi:10.1016/j.isci.2024.108959), 2024-01-29
Supplement: mmc1.pdf [file mmc1.pdf]

**Supplemental information**

**Metabolic rewiring and autophagy**

**inhibition correct lysosomal storage disease**

**in mucopolysaccharidosis IIIB**

**Melania Scarcella, Gianluca Scerra, Mariangela Ciampa, Marianna Caterino, Michele Costanzo, Laura Rinaldi, Antonio Feliciello, Serenella Anzilotti, Chiara Fiorentino, Maurizio Renna, Margherita Ruoppolo, Luigi Michele Pavone, Massimo D'Agostino, and Valeria De Pasquale**

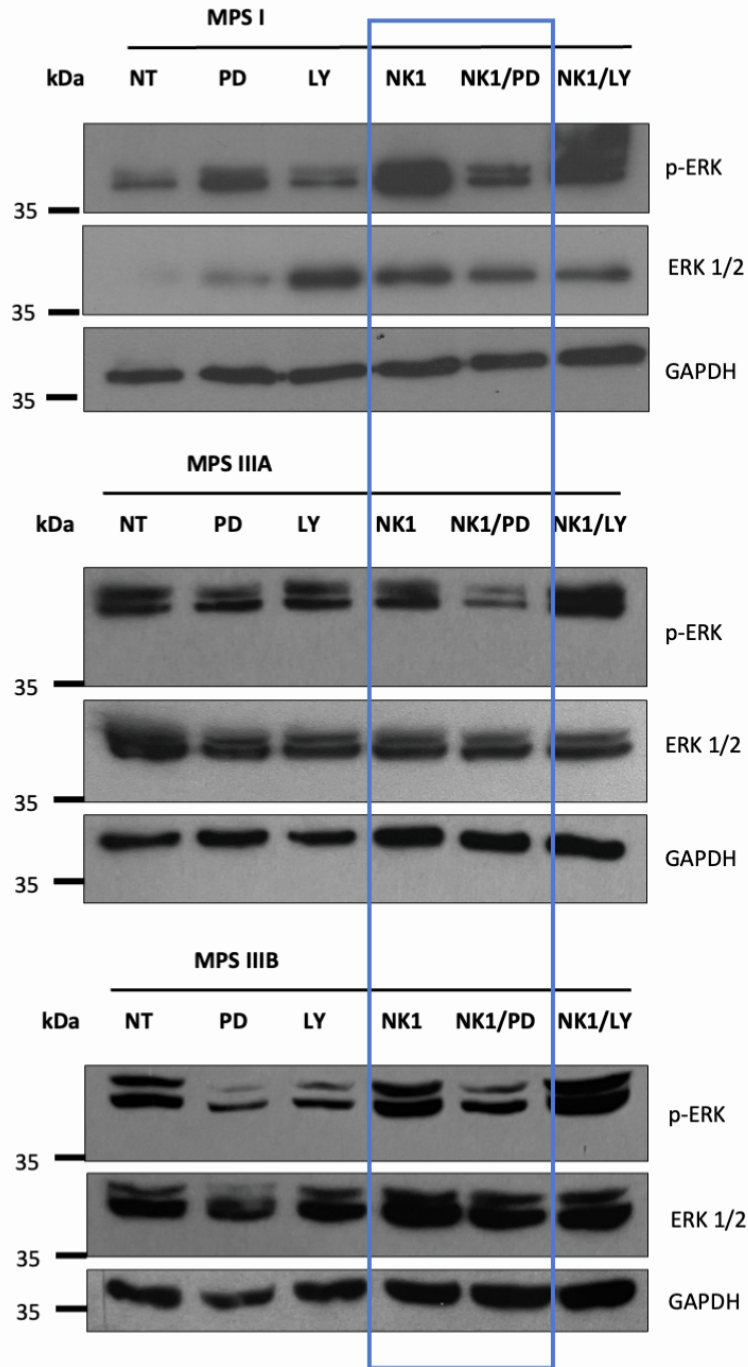

**Figure S1. p-ERK protein levels in MPS fibroblasts as detected by Western blotting analysis, related to Figure 2**

Patient fibroblasts untreated and treated with PD98059, LY294002, NK1, NK1/PD98059 and NK1/LY294002 were analyzed for ERK1/2 phosphorylation with specific anti-p-ERK, anti-ERK antibodies. Anti-GAPDH antibody was used to ensure equal protein loading in all gel lanes. The blots reported are representative of three independent experiments of equal design.

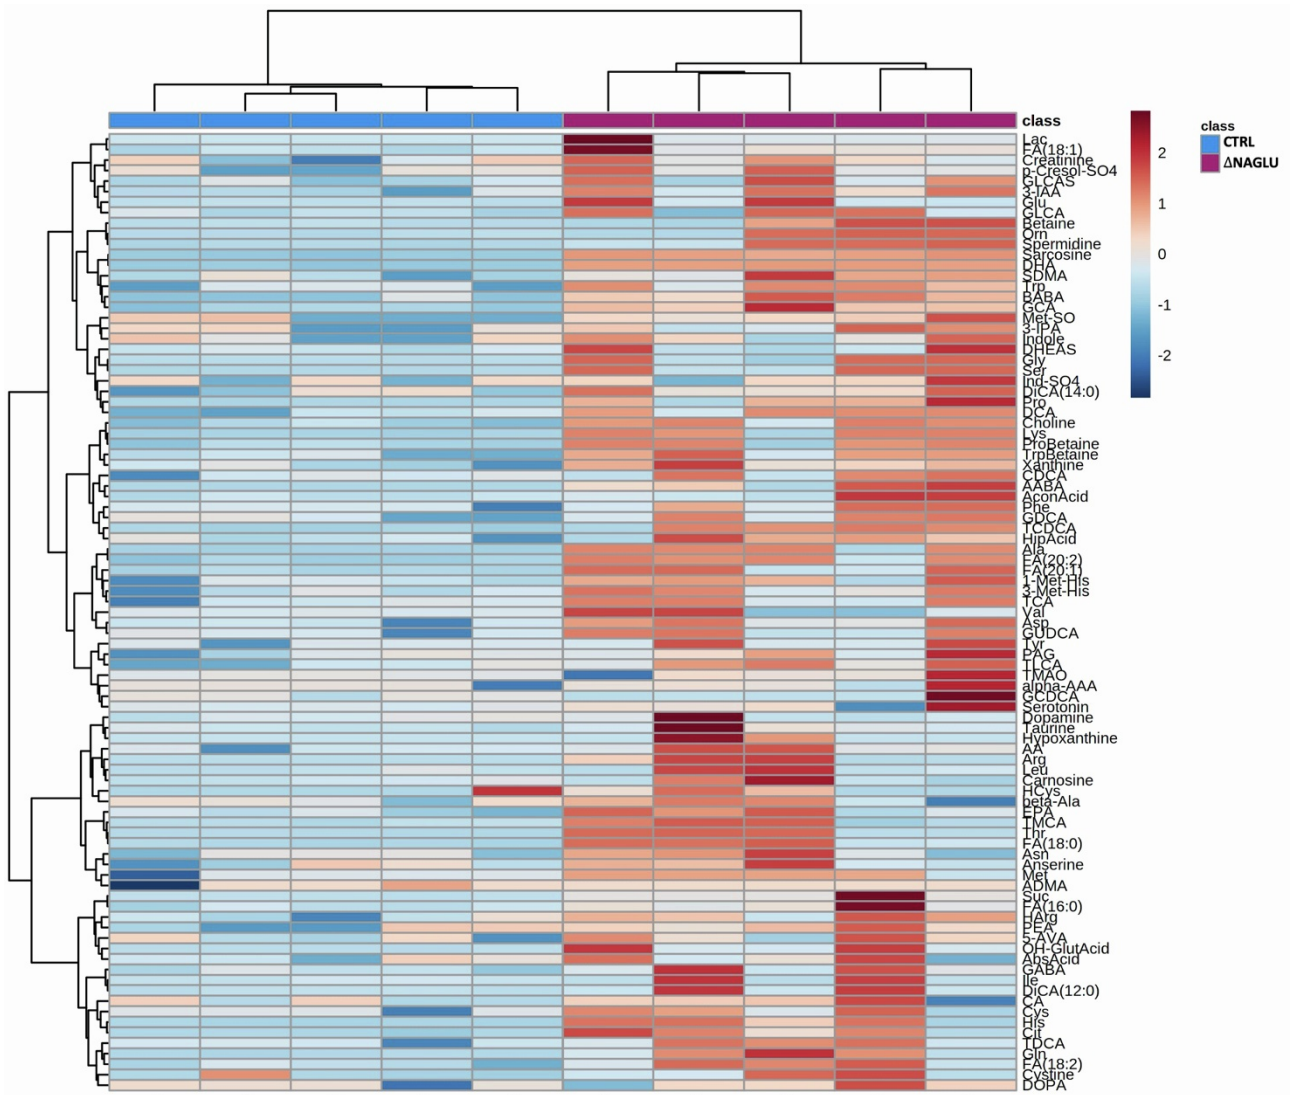

**Figure S2. Heatmap of cellular metabolites concentrations in each group ( $\Delta$ NAGLU vs CTRL), ranked by t-test ( $p < 0.05$ ), related to Figure 5**  
 The intensity of the colored boxes represents the relative abundance in each group. The concentrations ( $\mu$ M) of the identified metabolites were normalized by total protein content (50  $\mu$ g), log10-transformed, and Pareto-scaled.

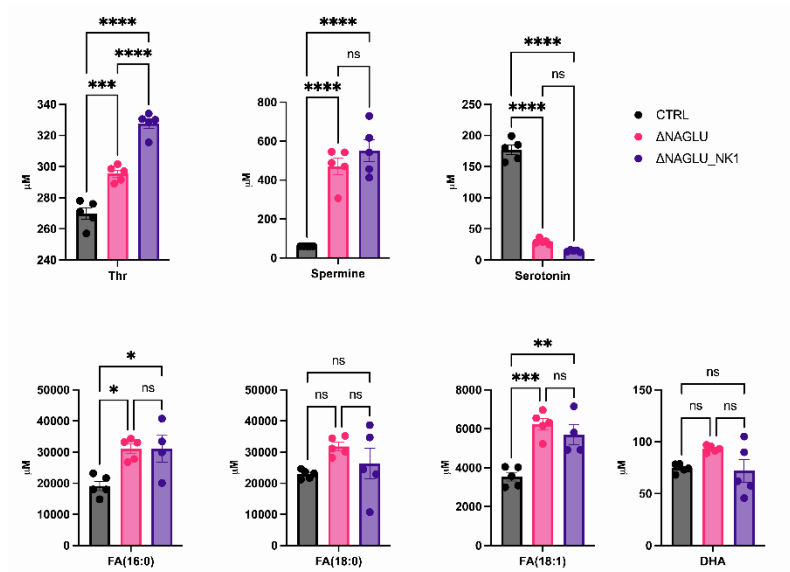

**Figure S3. Abundance of discriminant metabolites in  $\Delta$ NAGLU were evaluated in comparison with CTRL and  $\Delta$ NAGLU treatment with NK1 ( $\Delta$ NAGLU\_NK1), related to Table 1**

Plots represents the analytes concentrations (means  $\pm$  SEM). The significant differences between groups were evaluated performing ordinary one-way ANOVA test and Hold-Sidak's multiple comparison test in normally distributed datasets or Kruskal-Wallis test and Dunn's multiple comparison test in not-normally distributed datasets. The normal distribution was verified according to D'Agostino and Pearson test. (\*  $p < 0.05$ , \*\*  $p < 0.01$ , \*\*\*  $p < 0.001$ , \*\*\*\*  $p < 0.0001$ , ns = not significant).

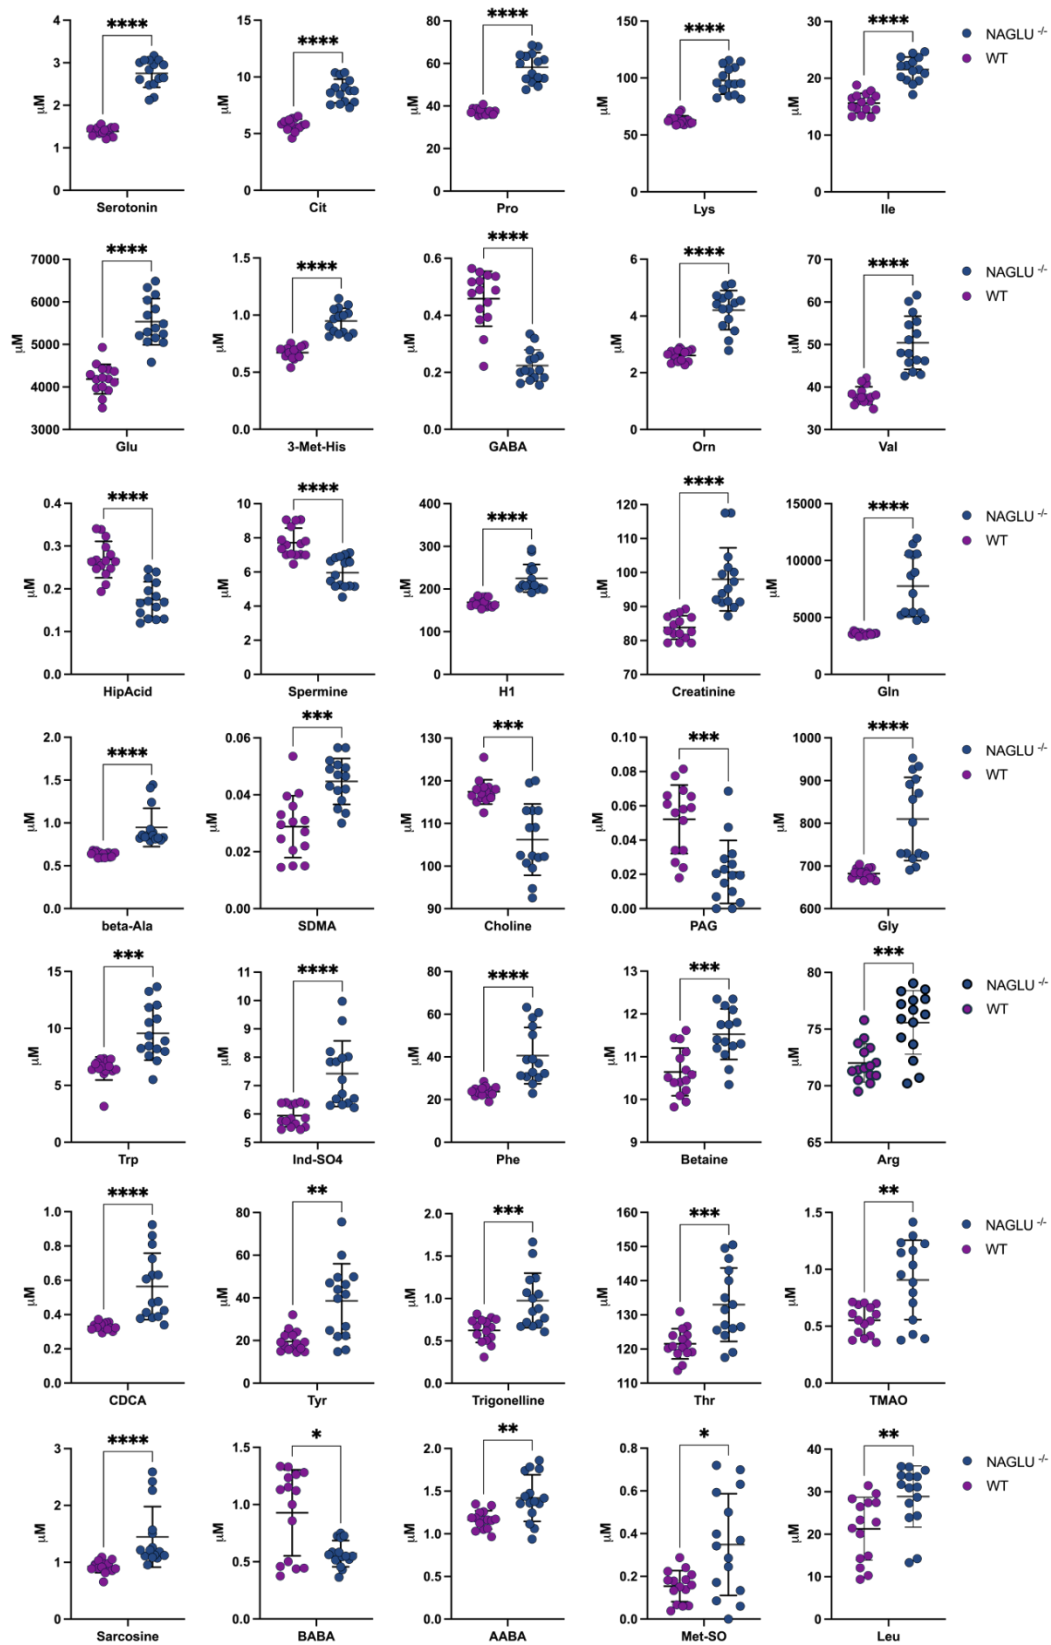

**Figure S4. Abundances of discriminant metabolites in brain tissue from NAGLU<sup>-/-</sup> mice were evaluated as compared to WT, related to Table 2**

Plots represents the analytes concentrations (means  $\pm$  SEM). The significant differences between groups were evaluated performing parametric t test with Welch correction in normally distributed datasets or Mann-Whitney test in not-normally distributed datasets (\*  $p < 0.05$ , \*\*  $p < 0.01$ , \*\*\*  $p < 0.001$  \*\*\*\*  $p < 0.0001$ , ns = not significant).

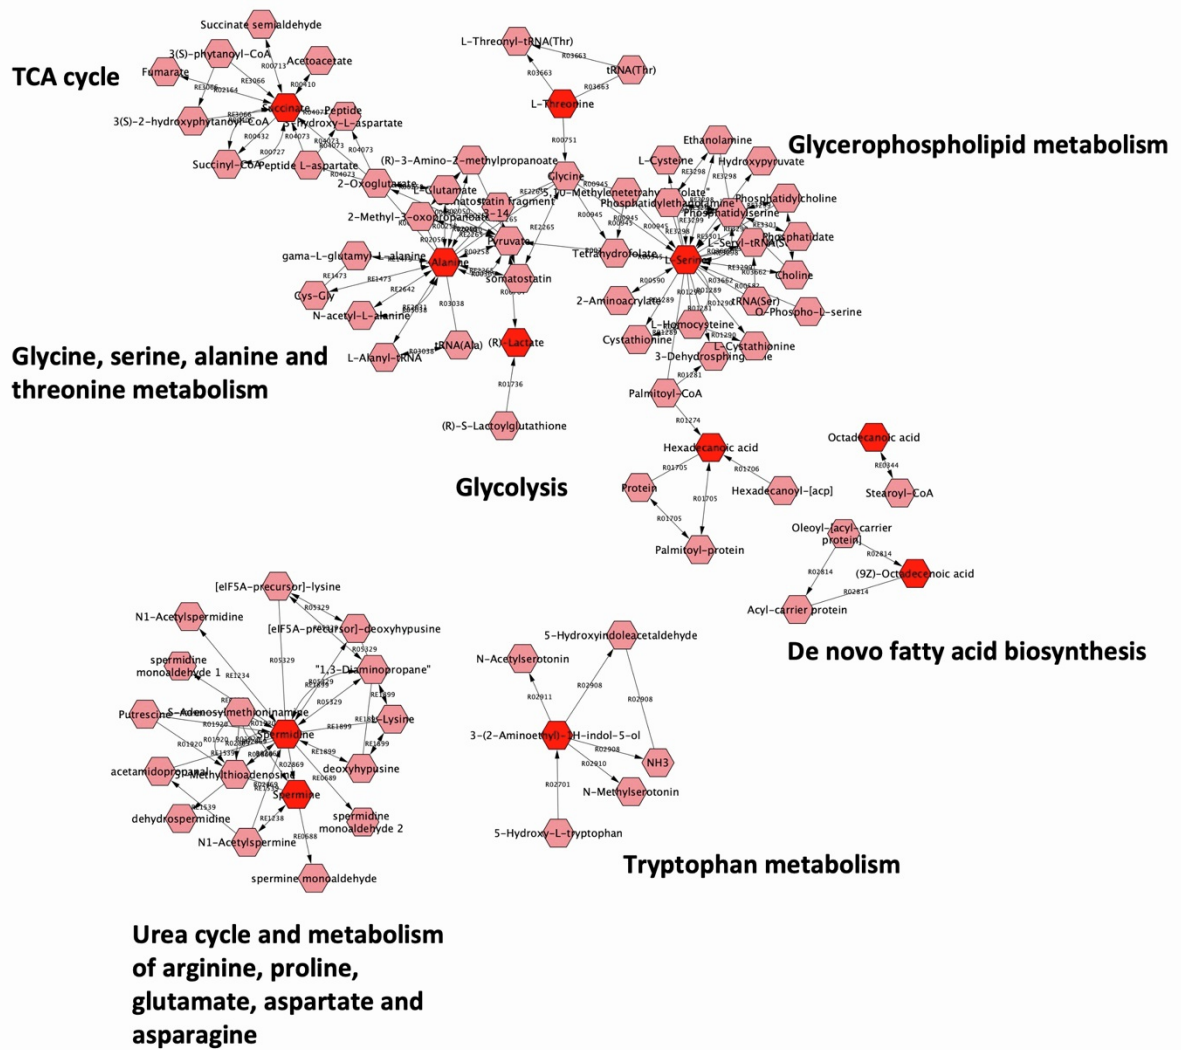

Figure S5. Relevant metabolic networks and enriched pathways obtained from the differential metabolome of  $\Delta$ NAGLU cells, related to Figure 5

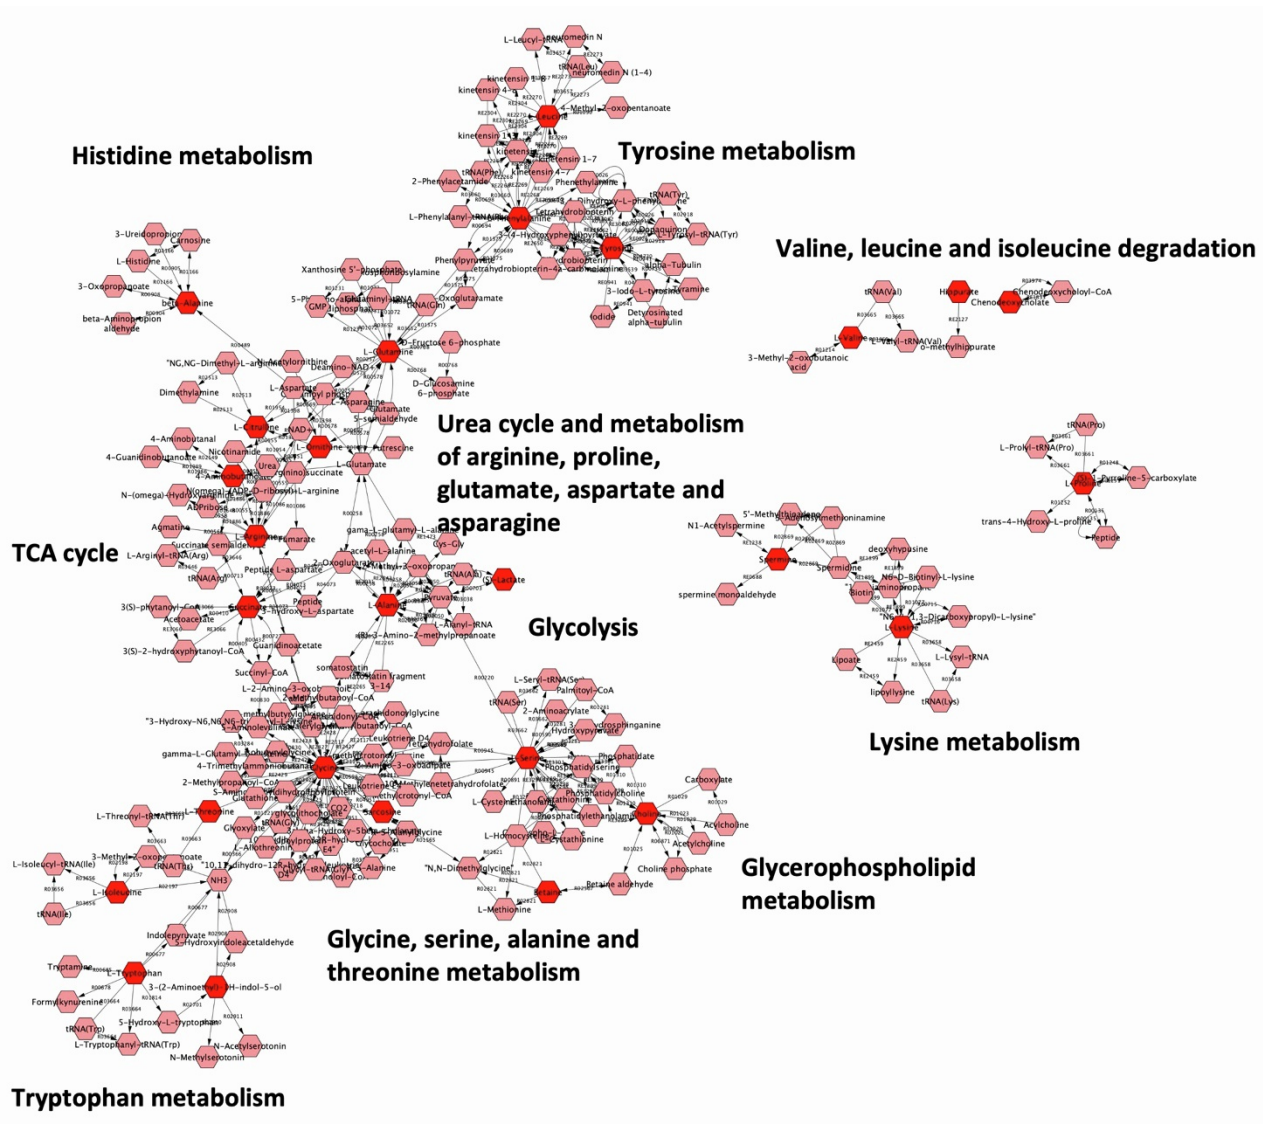

**Figure S6. Relevant metabolic networks and enriched pathways obtained from the differential metabolome of NAGLU<sup>-/-</sup> mice brains, related to Figure 5**

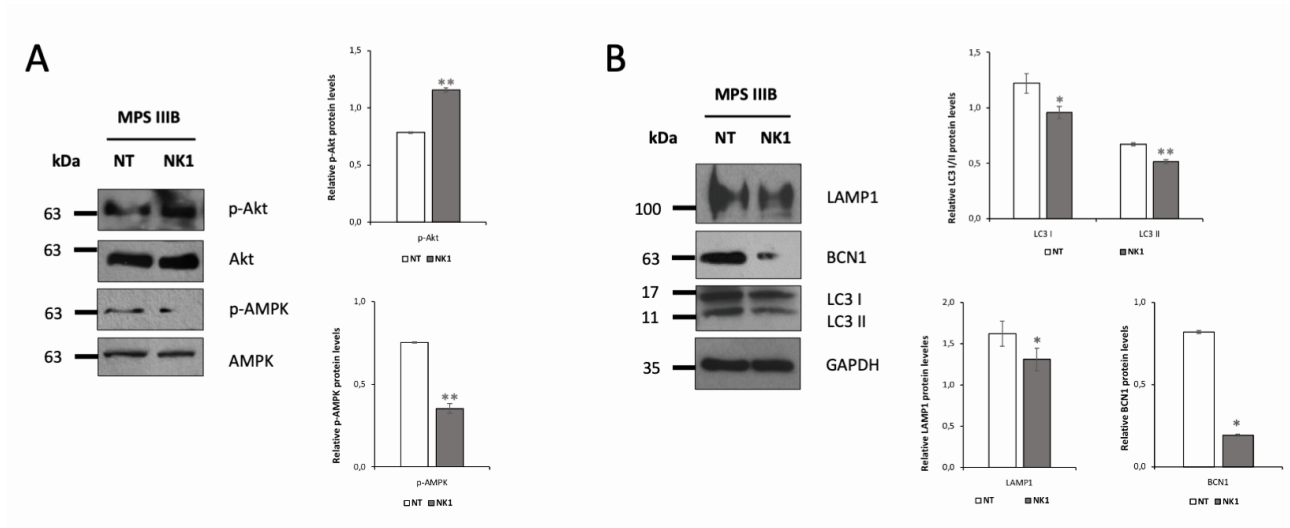

**Figure S7. Molecular analysis of the signaling activated by NK1 in MPS III B fibroblasts and the impact on the autophagic proteins, related to Figure 2, 3, 4 and 9**

**(A)** p-Akt, p-AMPK protein levels in MPS fibroblasts untreated and treated with NK1  $10^{-6}$ M as detected by Western blotting analysis. Membranes were incubated with anti-p-Akt, anti-Akt, anti-p-AMPK, anti-AMPK and anti-GAPDH antibodies was used to ensure equal protein loading in all gel lanes. The blots reported are representative of three independent experiments of equal design. Densitometric analysis of the bands was performed, and the data obtained are reported on histograms. \*\*P < 0.01.

**(B)** LAMP1, BCN1, LC3 I, II protein levels in MPS fibroblasts untreated and treated with NK1  $10^{-6}$ M as detected by Western blotting analysis. Membranes were incubated with anti-LAMP1, anti-BCN1, anti-LC3 and anti-GAPDH antibodies was used to ensure equal protein loading in all gel lanes. The blots reported are representative of three independent experiments of equal design. Densitometric analysis of the bands was performed, and the data obtained are reported on histograms. \*P < 0.05, \*\*P < 0.01.
